# Supplementary material for: Comparison of Tepotinib, Paclitaxel, or Ramucirumab Efficacy According to the Copy Number or Phosphorylation Status of the MET Gene: Doublet Treatment versus Single Agent Treatment
Source: MDPI journal article supplement (doi:10.3390/ijms25031769), 2024-02-01

FACs data

*Cell lines SNU620, MKN45, HS746T, SNU638, AGS*

• **SNU620**

• **Control**

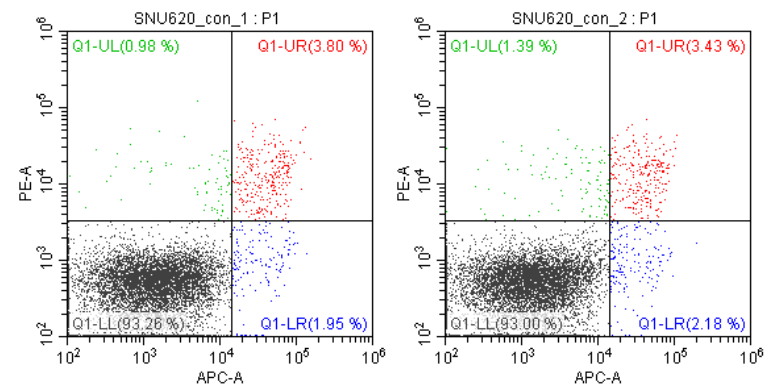

• **PTX 20nM**

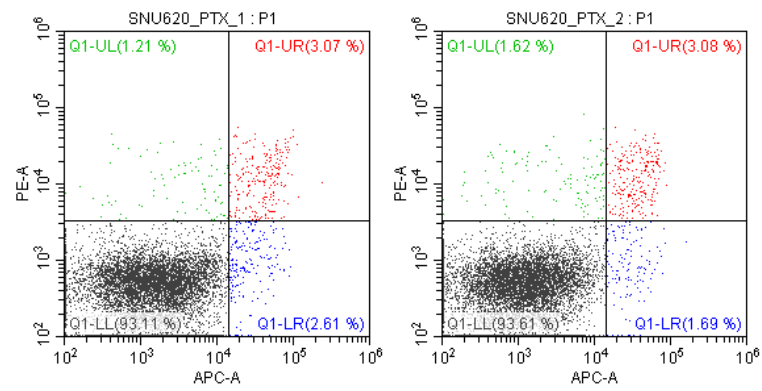

• **Tepotinib 10nM+PTX20nM**

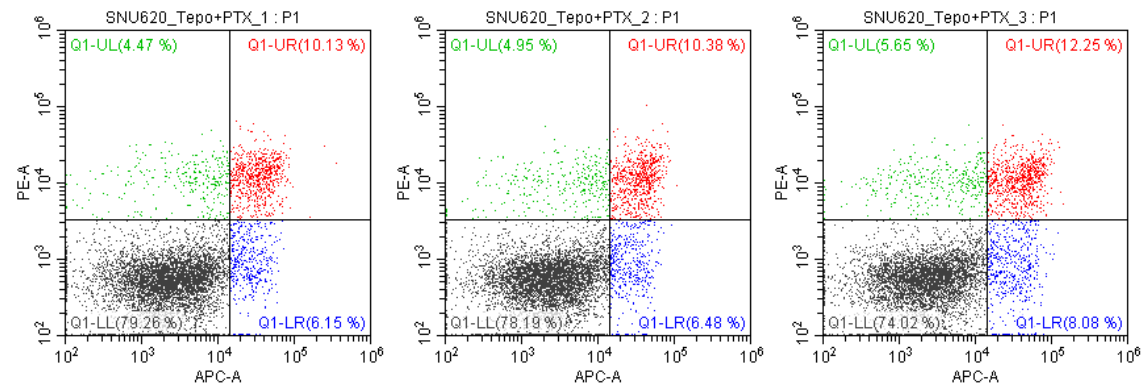

• **Ramucirumab 10nM**

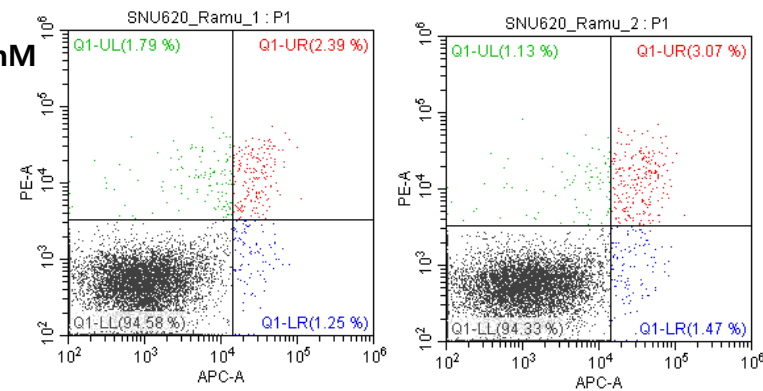

• **Tepotinib 10nM**

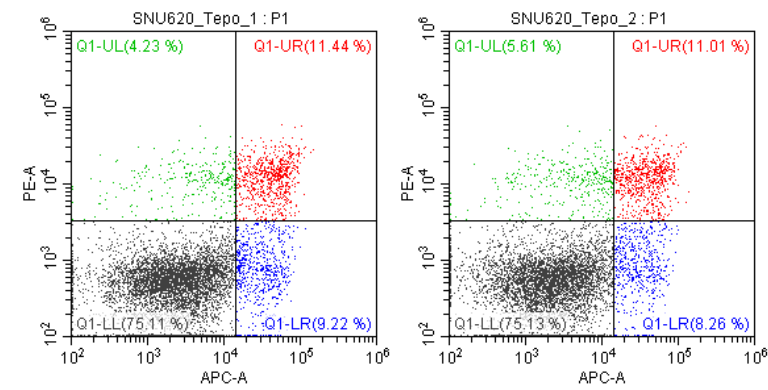

• **Ramucirumab 10nM+PTX20nM**

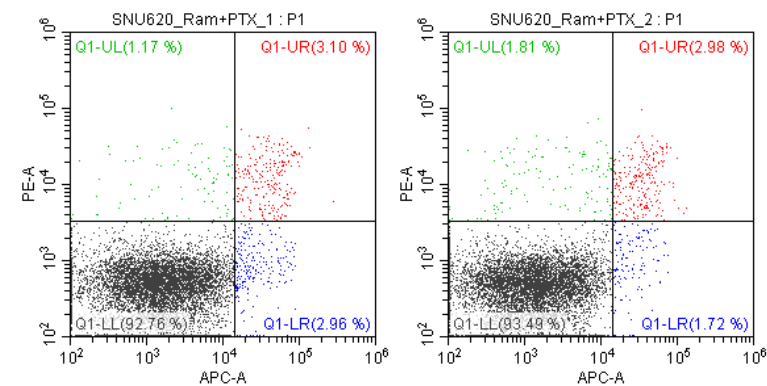

- SNU620

- Control

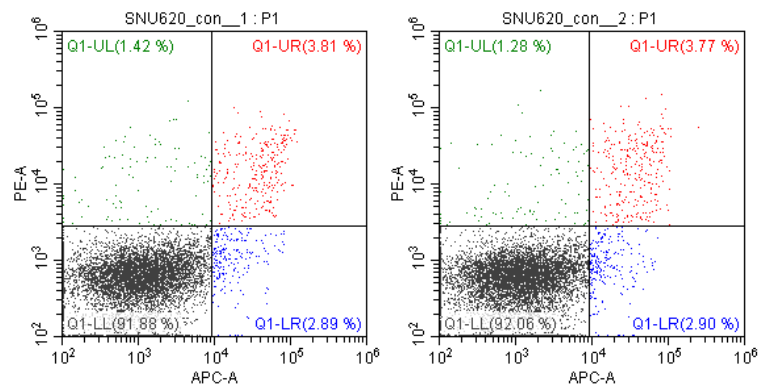

- Ramucirumab 10nM

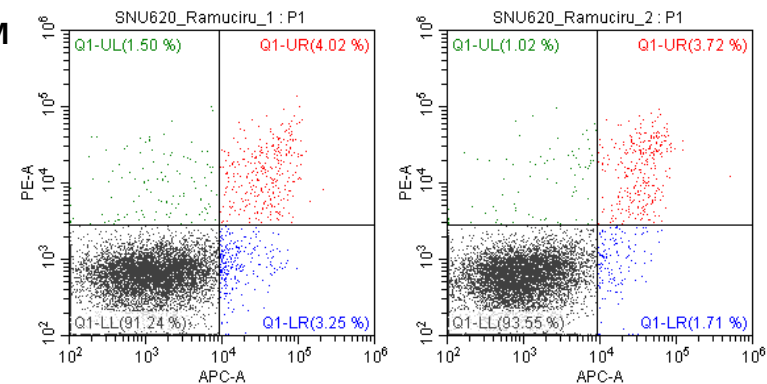

- PTX 20nM

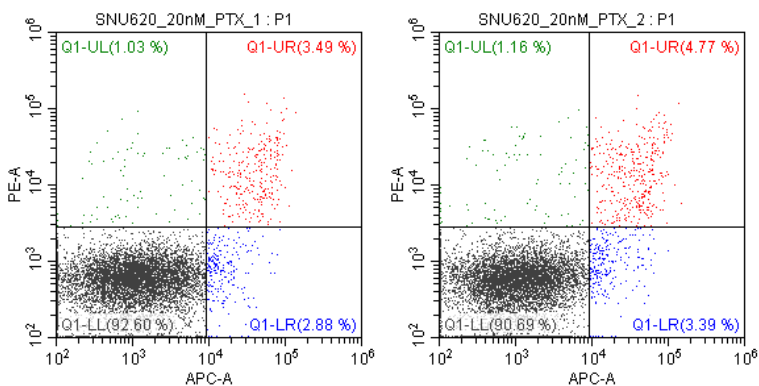

- Tepotinib 10nM

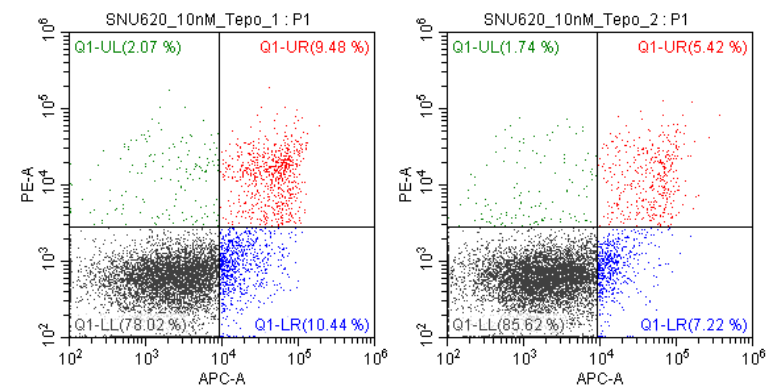

- Tepotinib 10nM+PTX20nM

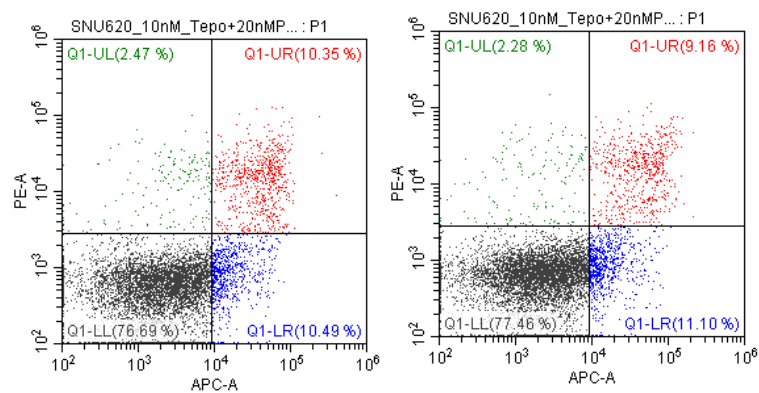

- Ramucirumab 10nM+PTX20nM

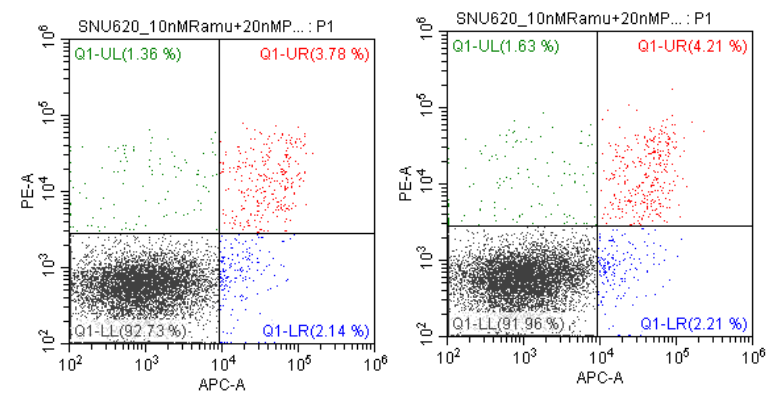

• SNU620

• Control

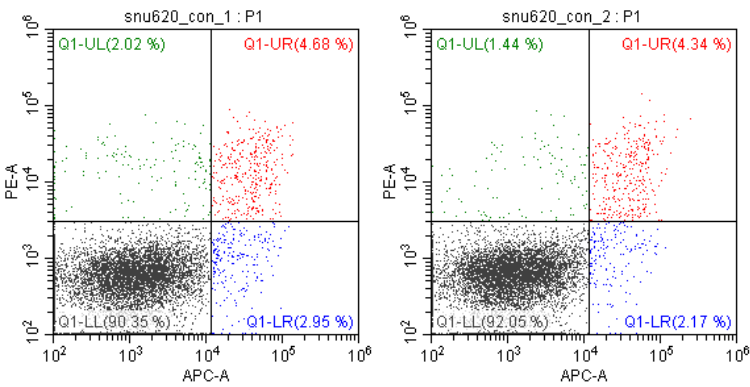

• Ramucirumab 10nM

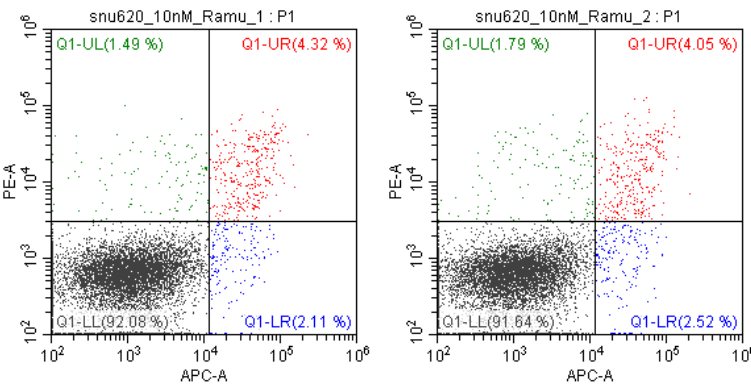

• PTX 20nM

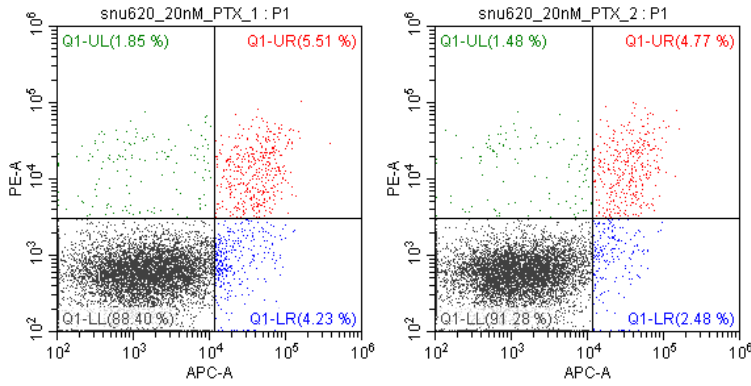

• Tepotinib 10nM

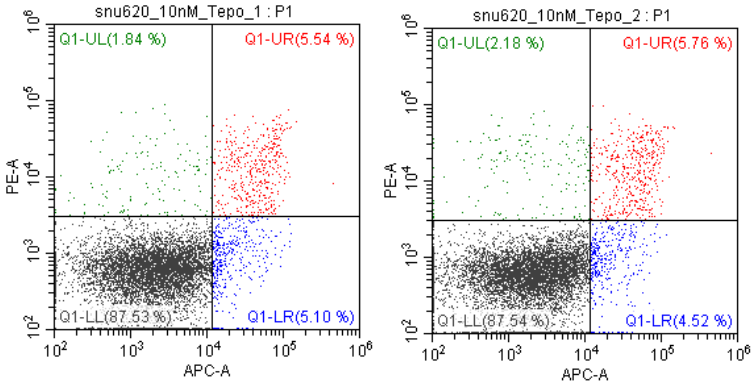

• Tepotinib 10nM+PTX20nM

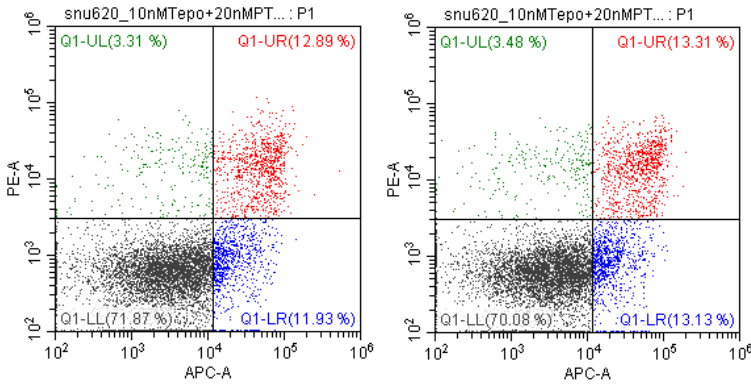

• Ramucirumab 10nM+PTX20nM

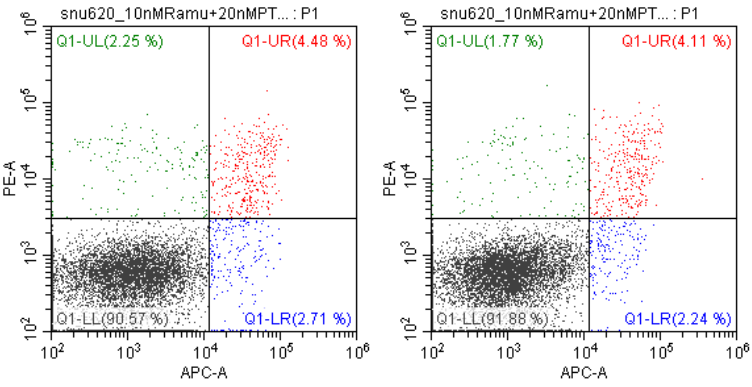

◆ MKN45

• Control

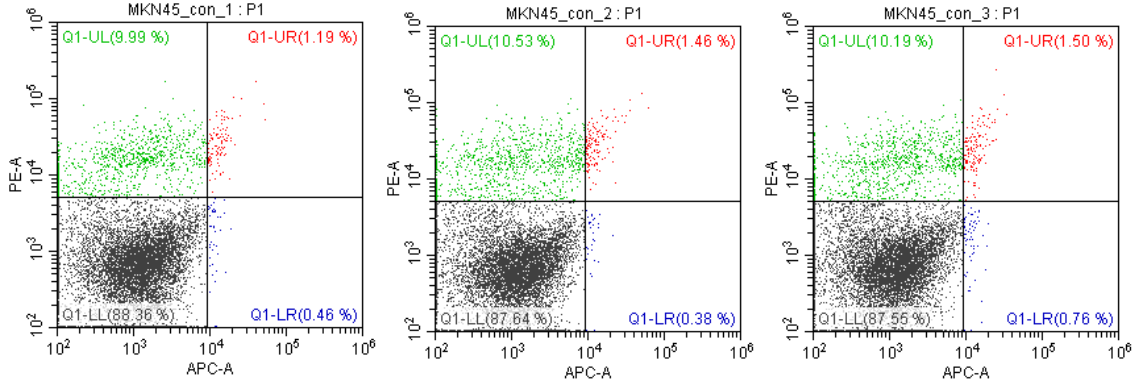

• PTX 20nM

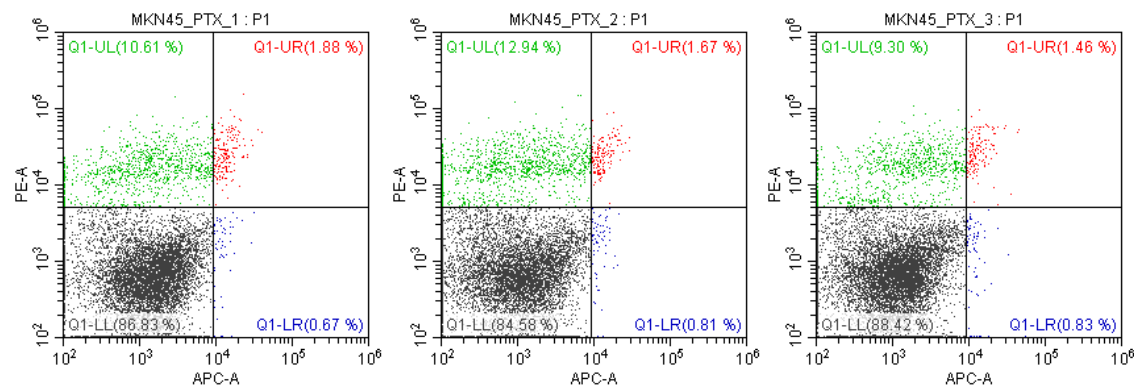

• Tepotinib 10nM+PTX20nM

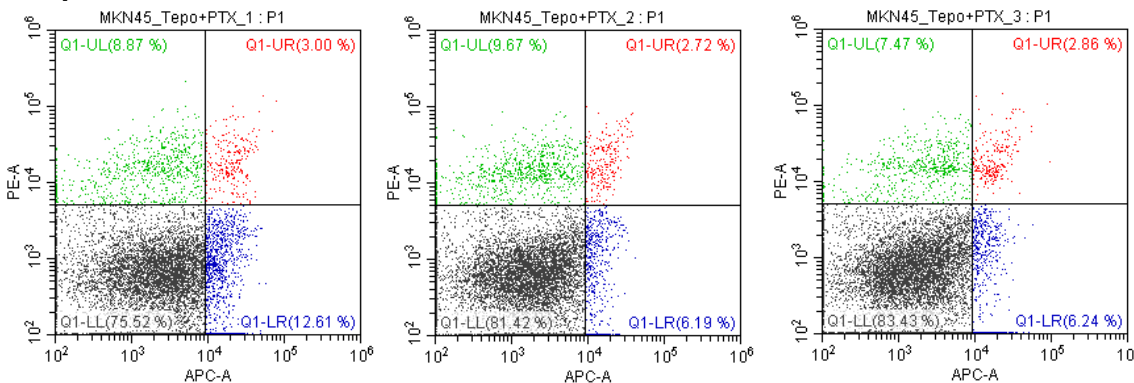

• Ramucirumab 10nM

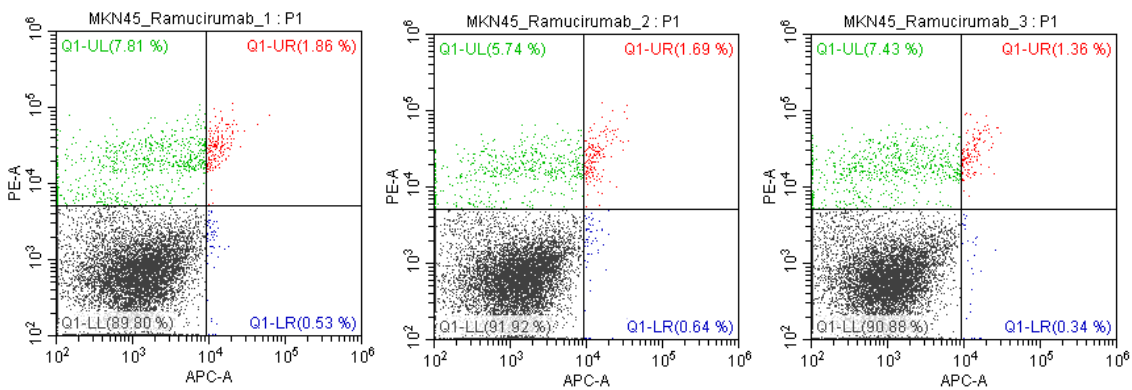

• Tepotinib 10nM

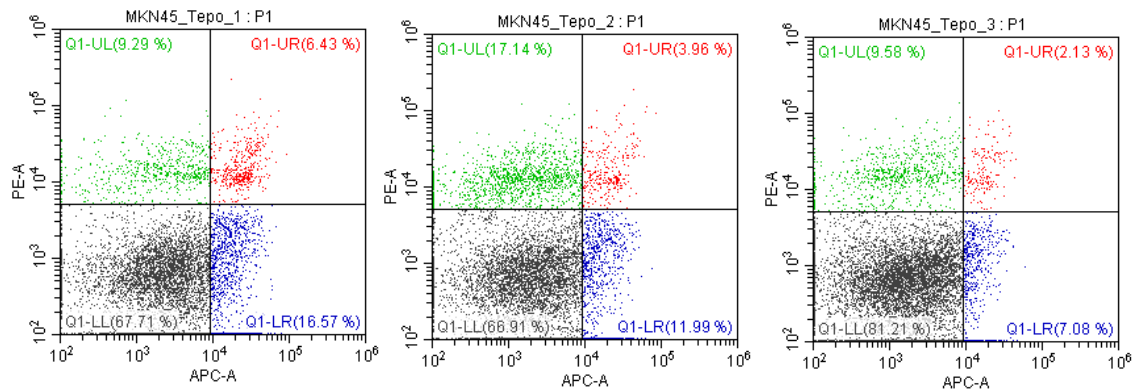

• Ramucirumab 10nM+PTX20nM

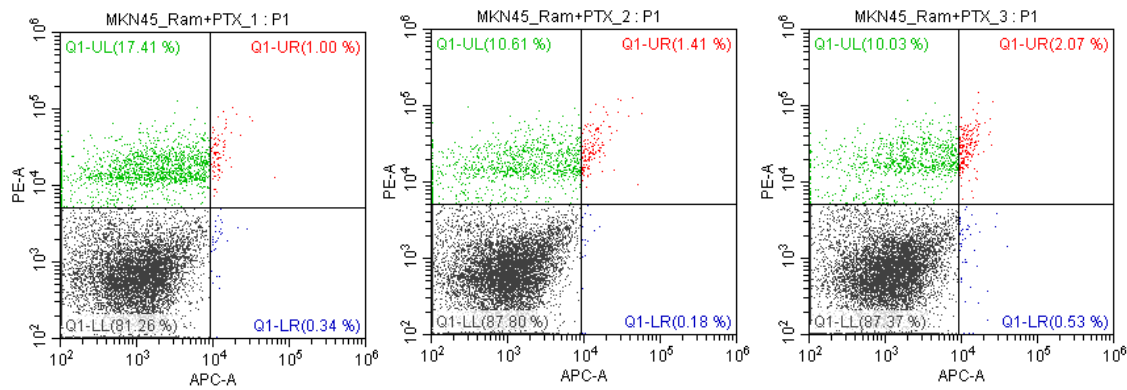



• **MKN45**

• **Control**

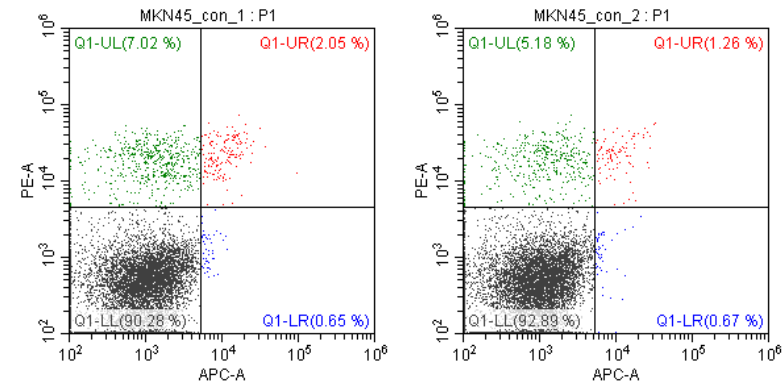

• **PTX 20nM**

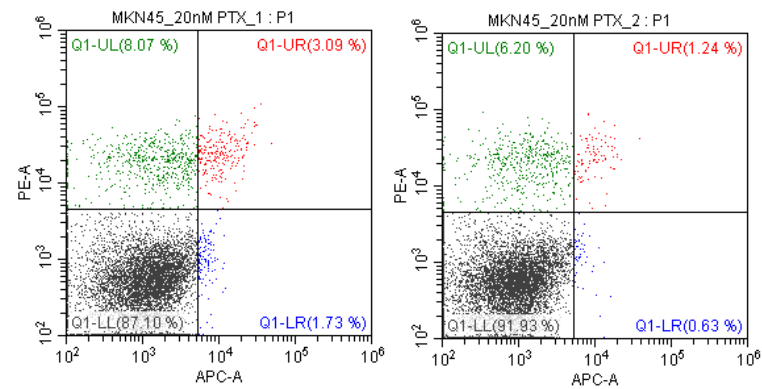

• **Tepotinib 10nM+PTX20nM**

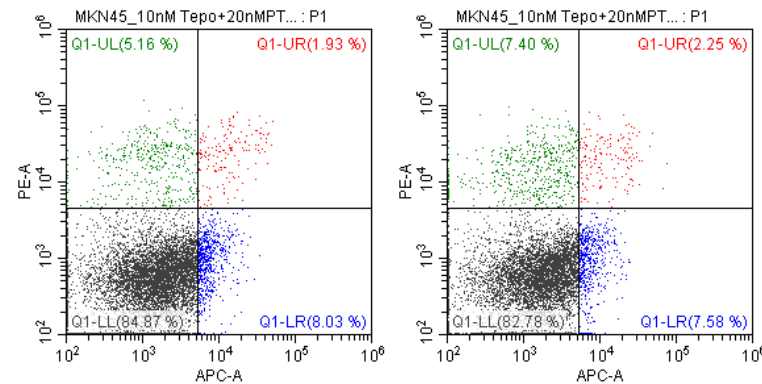

• **Ramucirumab 10nM**

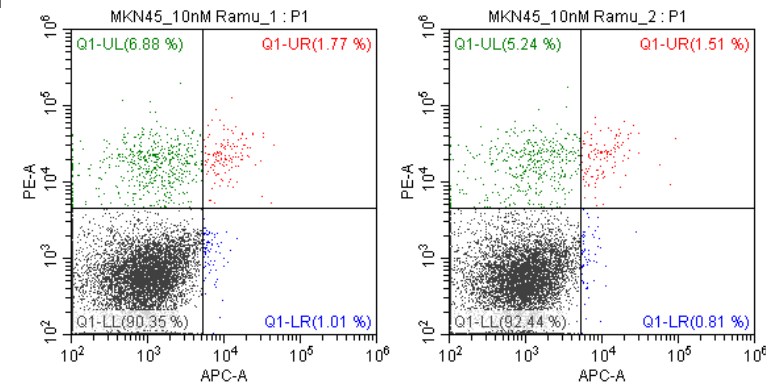

• **Tepotinib 10nM**

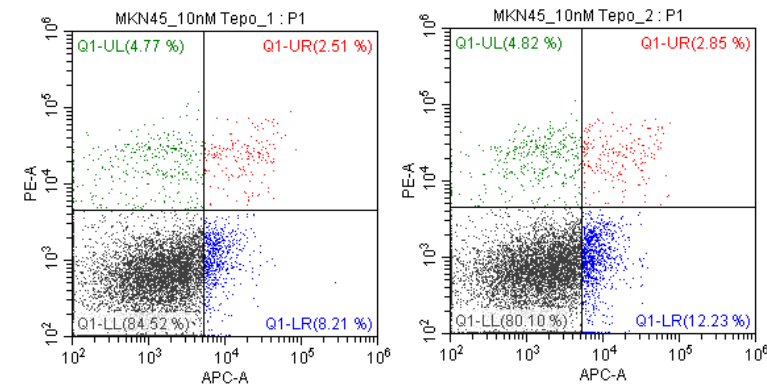

• **Ramucirumab 10nM+PTX20nM**

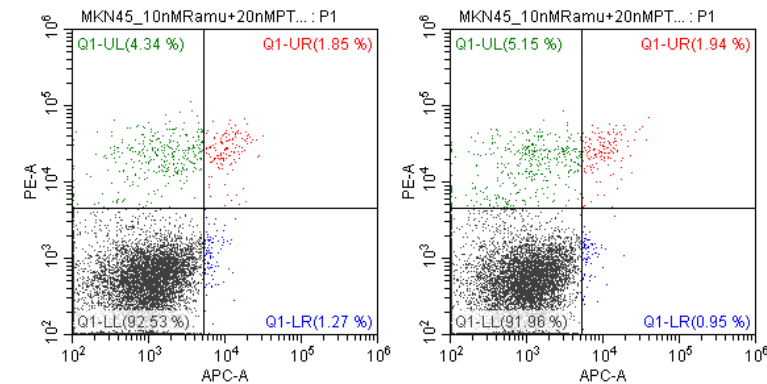

• **MKN45**

• **Control**

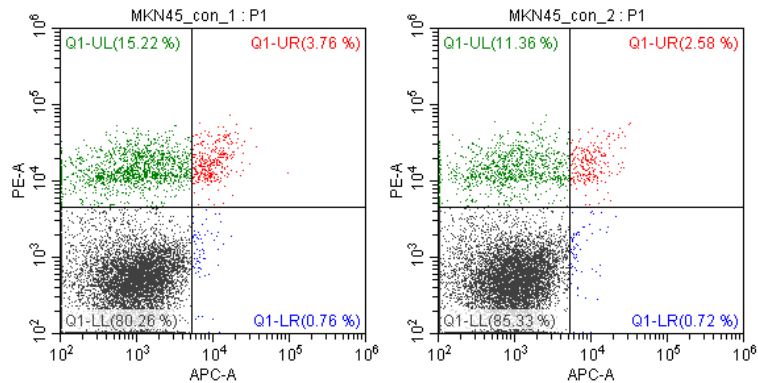

• **PTX 20nM**

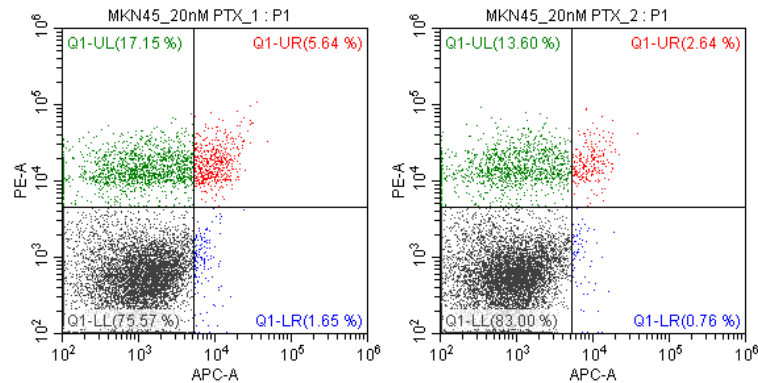

• **Tepotinib 10nM+PTX20nM**

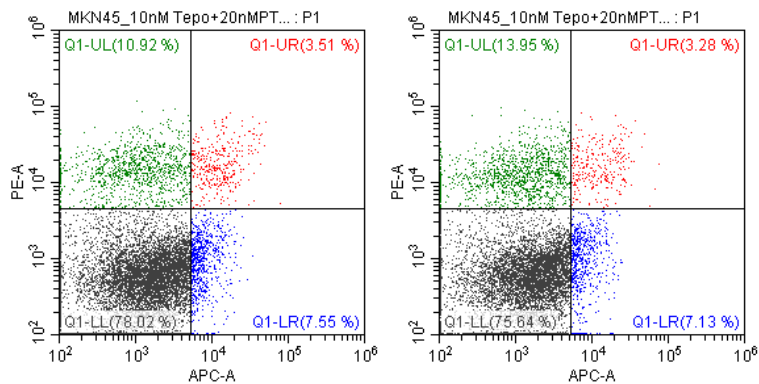

• **Ramucirumab 10nM**

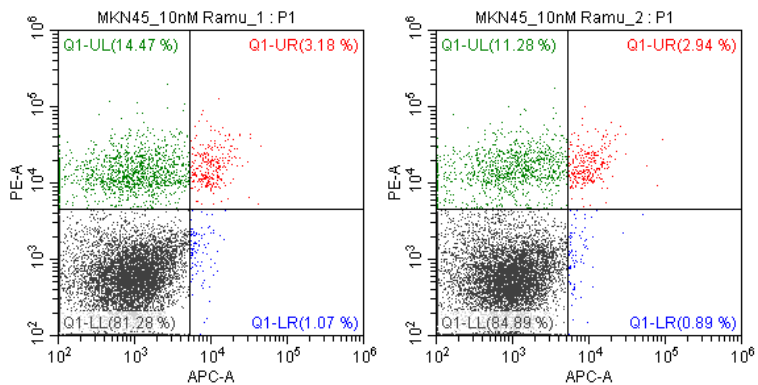

• **Tepotinib 10nM**

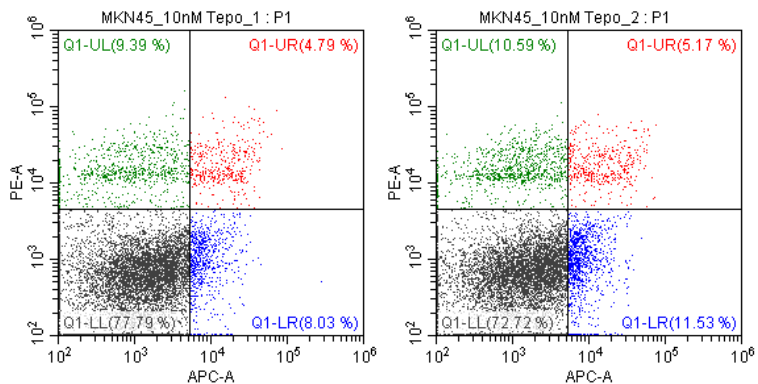

• **Ramucirumab 10nM+PTX20nM**

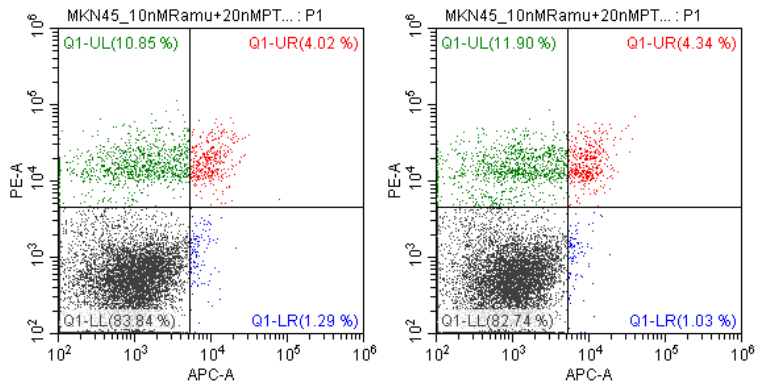

• **HS746T**

• **Control**

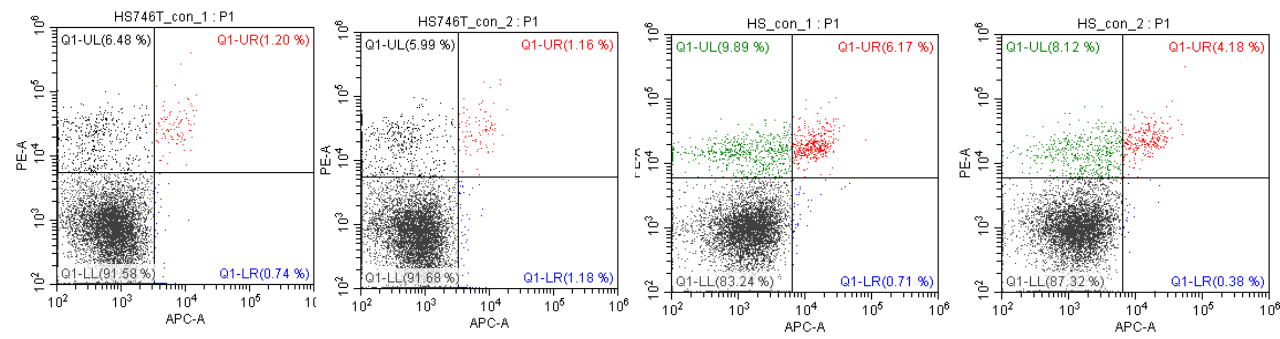

• **PTX 20nM**

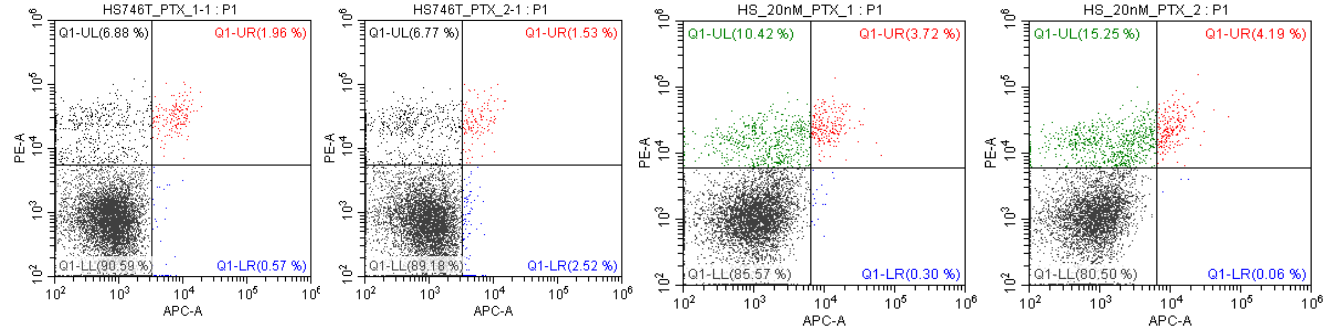

• **Tepotinib 10nM+PTX20nM**

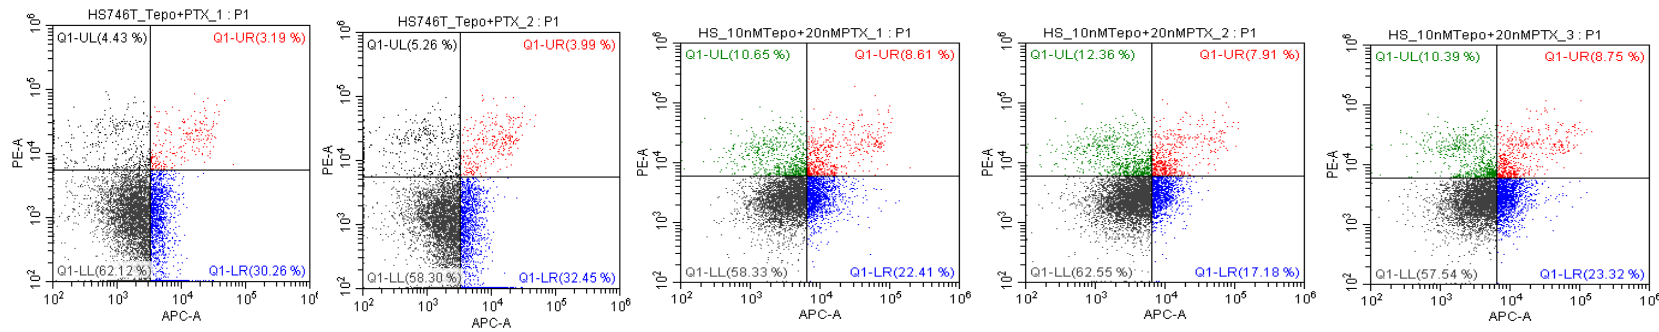

• **Ramucirumab 10nM**

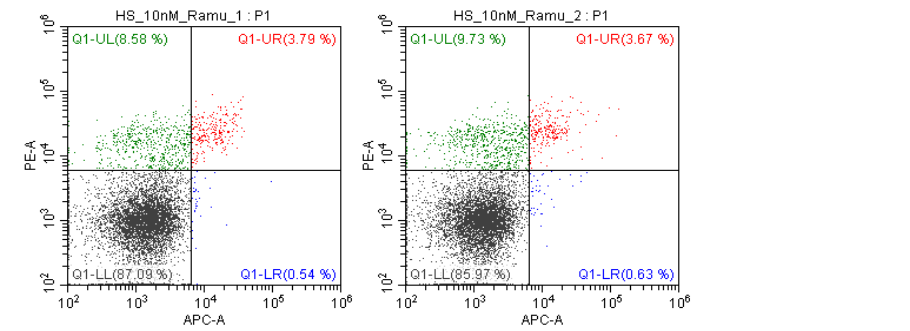

• **Tepotinib 10nM**

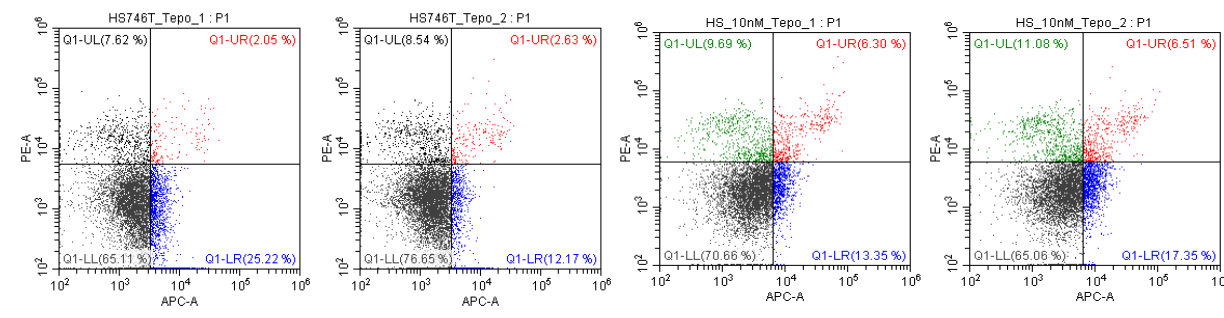

• **Ramucirumab 10nM+PTX20nM**

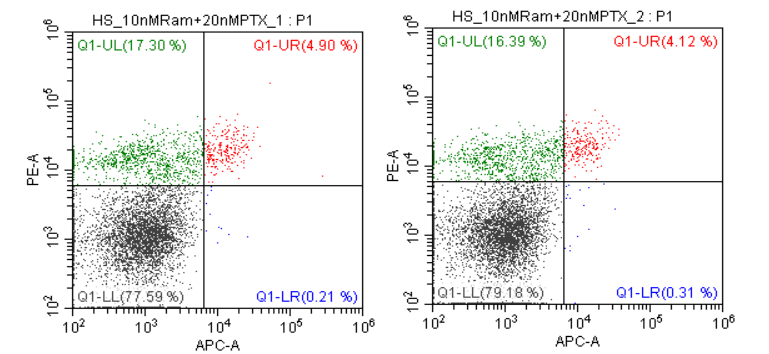



• SNU638

• Control

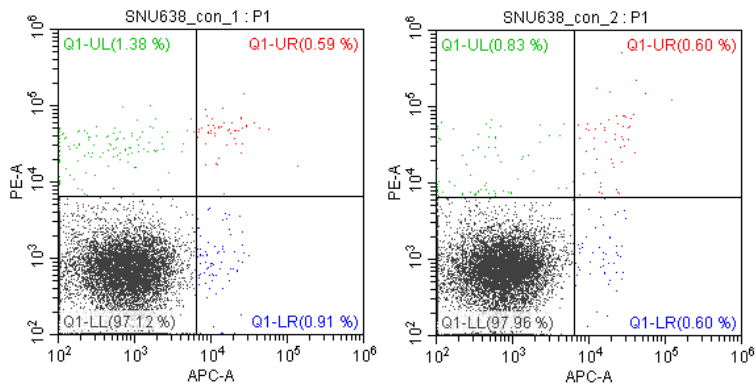

• PTX 20nM

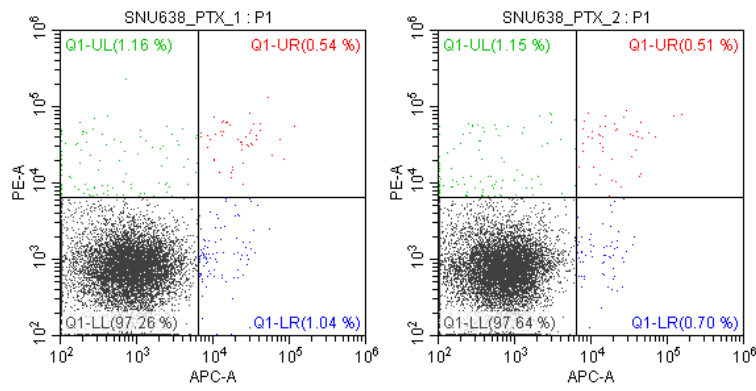

• Tepotinib 10nM+PTX20nM

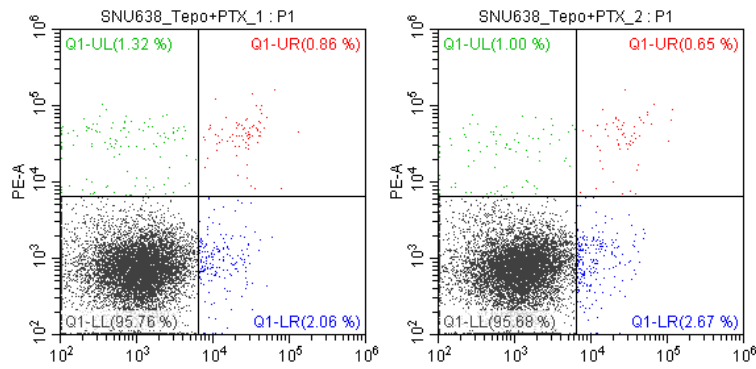

• Ramucirumab 10nM

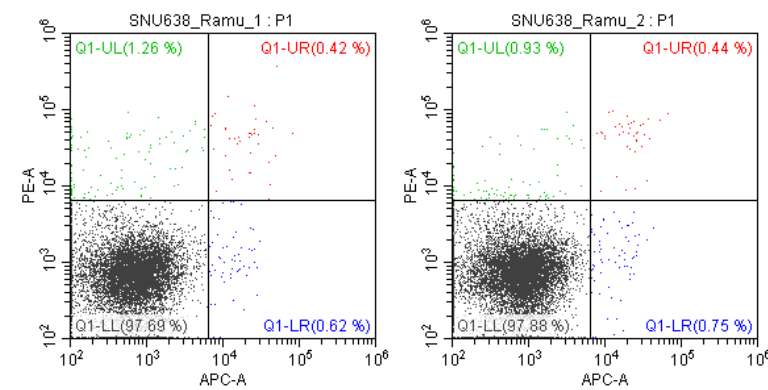

• Tepotinib 10nM

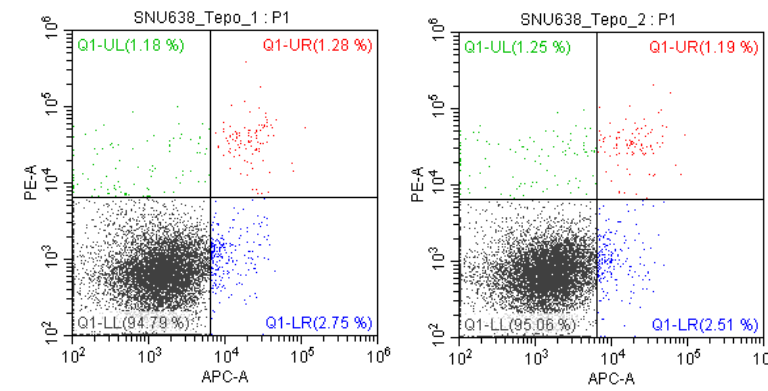

• Ramucirumab 10nM+PTX20nM

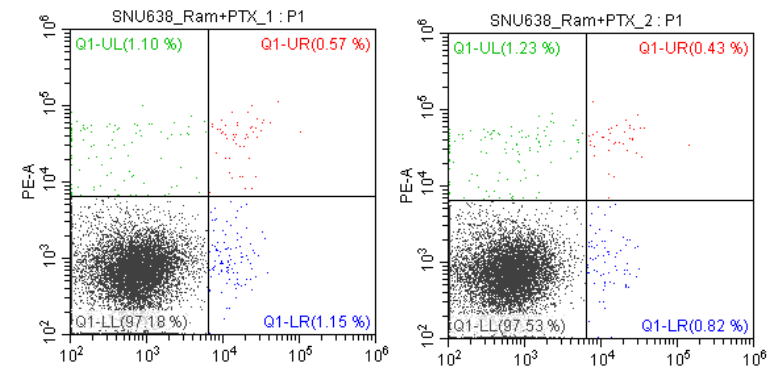

## • Control

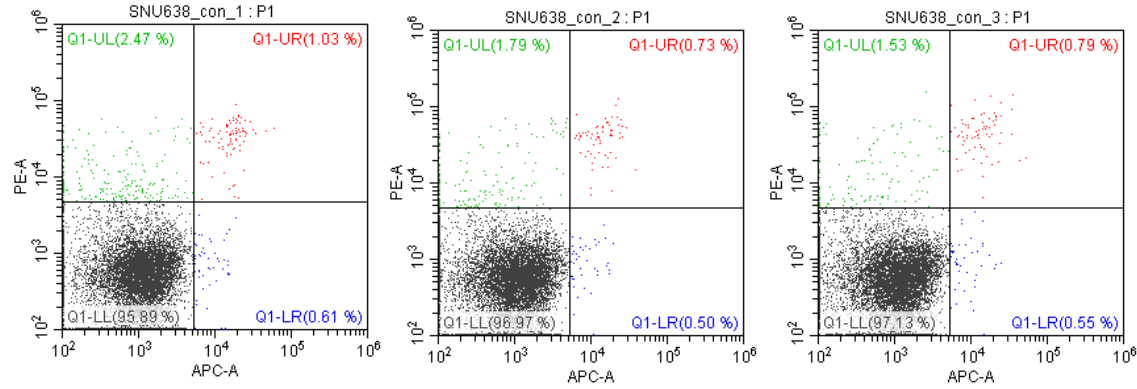

## • PTX 20nM

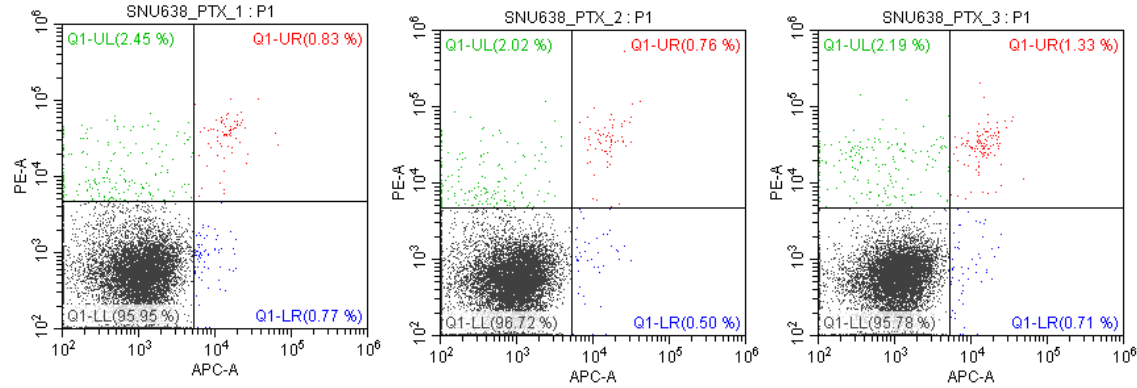

## • Tepotinib 10nM+PTX20nM

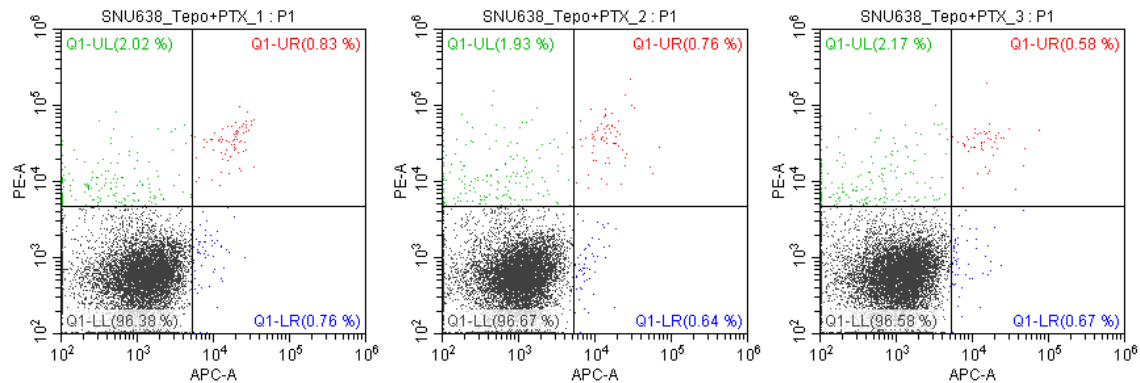

## • Ramucirumab 10nM

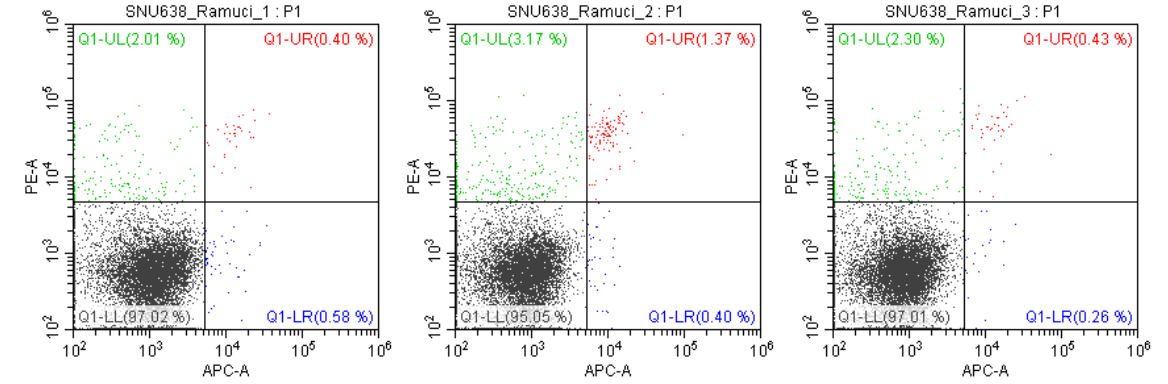

## • Tepotinib 10nM

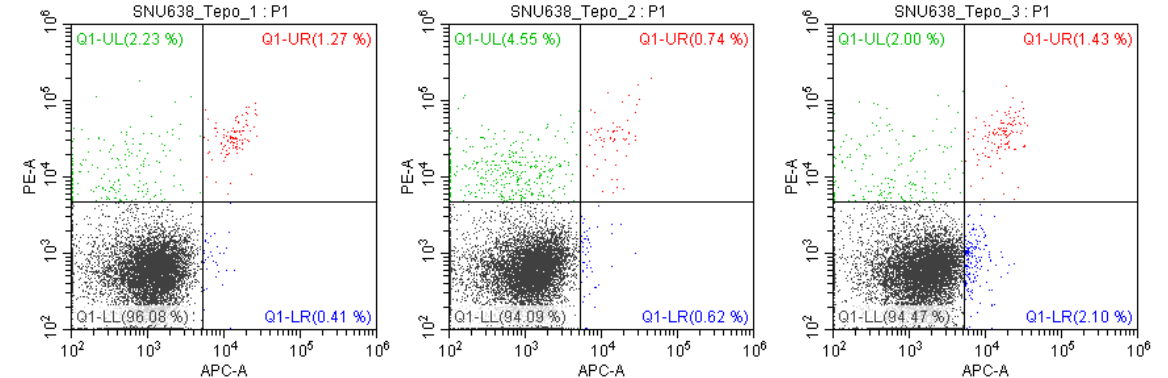

## • Ramucirumab 10nM+PTX20nM

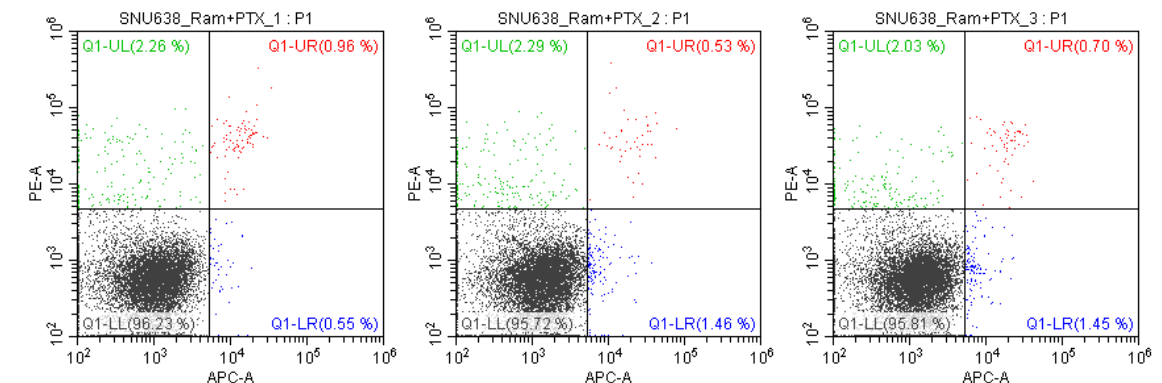

- AGS

- Control

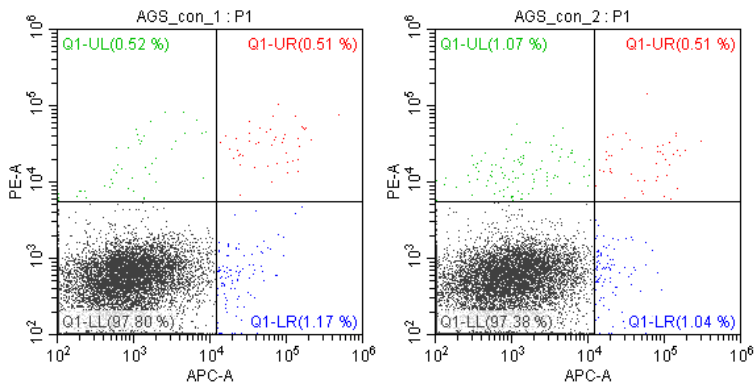

- PTX 20nM

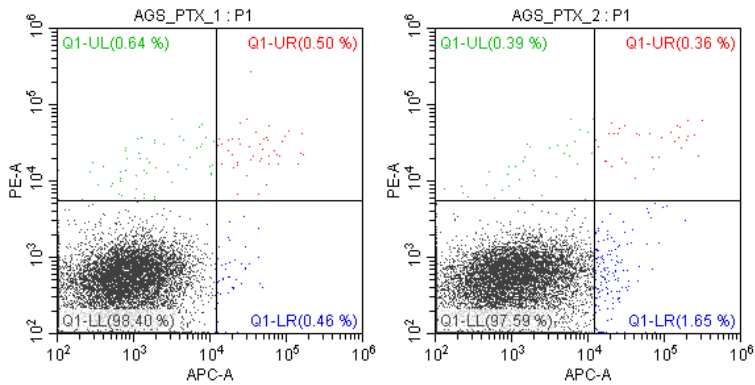

- Tepotinib 10nM+PTX20nM

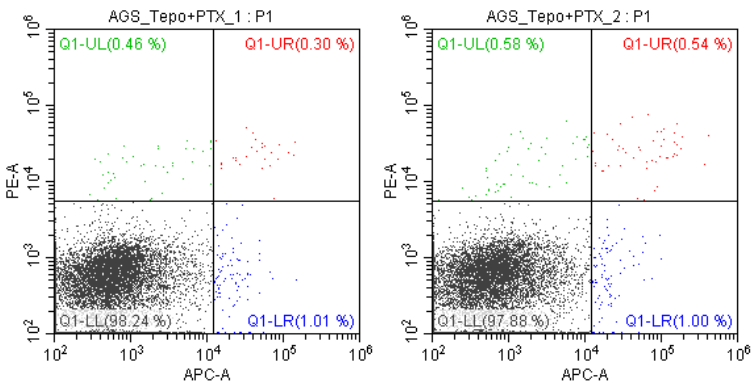

- Ramucirumab 10nM

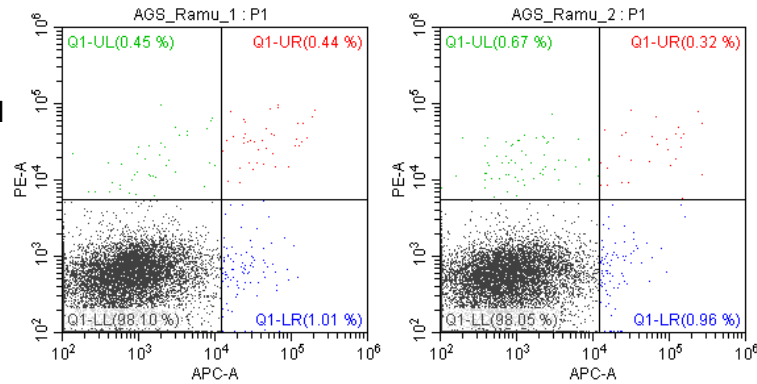

- Tepotinib 10nM

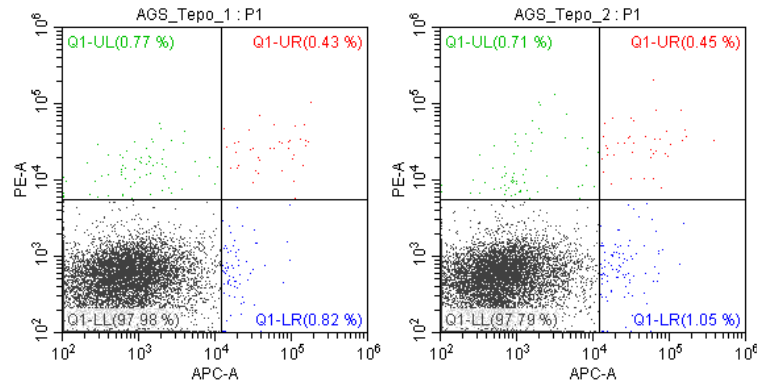

- Ramucirumab 10nM+PTX20nM

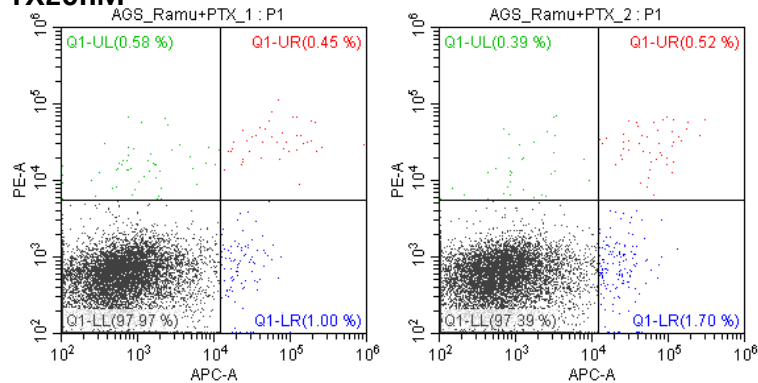

## • Control

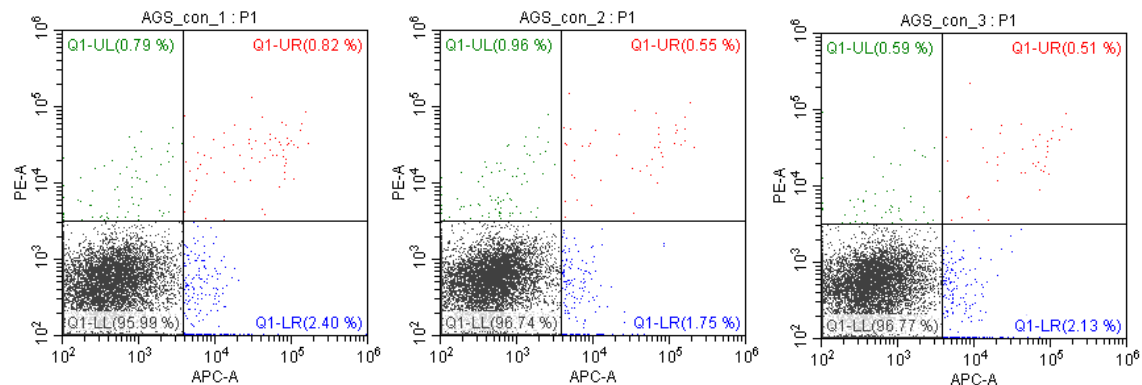

## • PTX 20nM

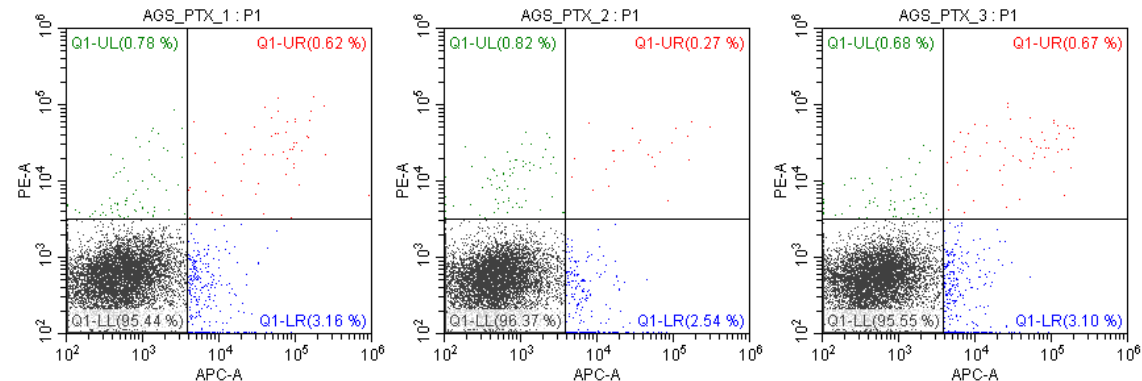

## • Tepotinib 10nM+PTX20nM

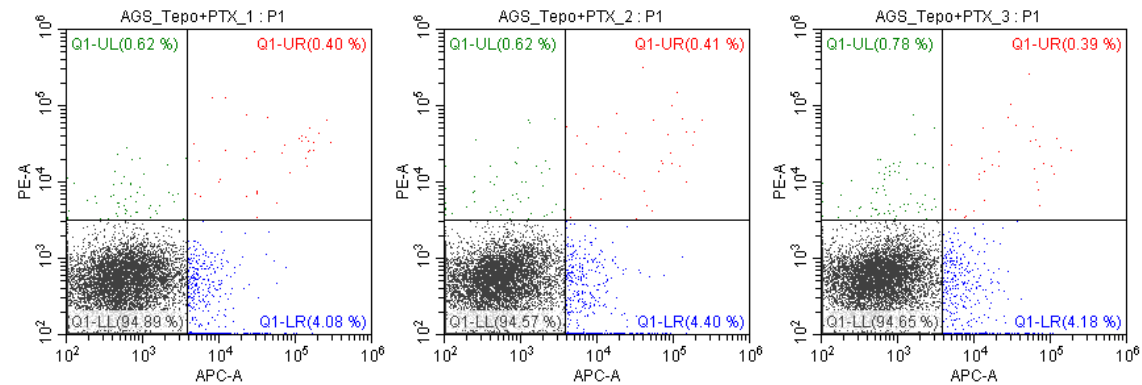

## • Ramucirumab 10nM

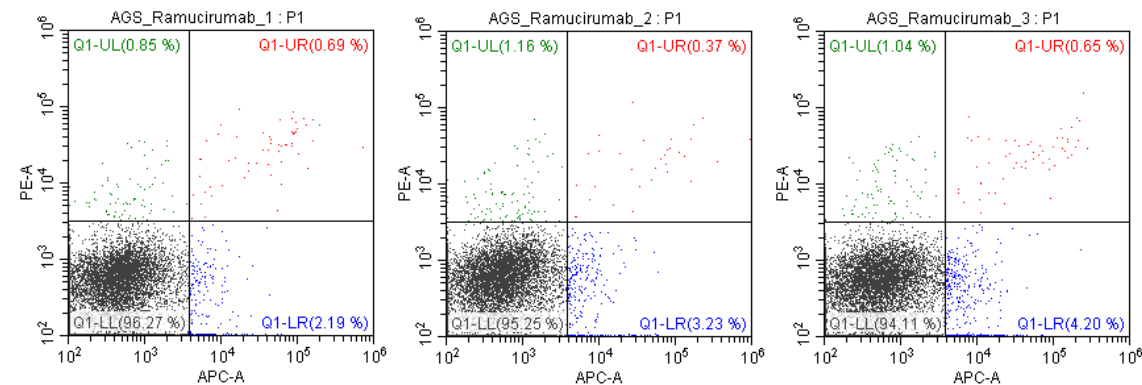

## • Tepotinib 10nM

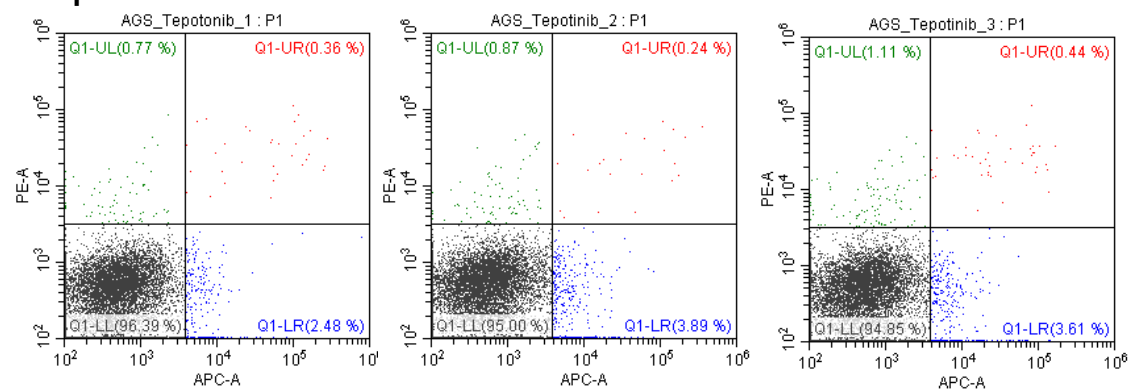

## • Ramucirumab 10nM+PTX20nM

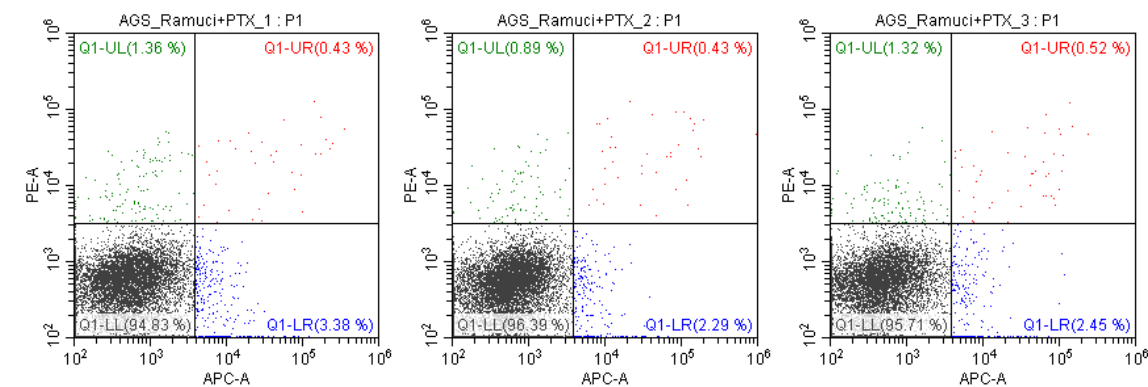

Supplement: s1 [file s1]
